# Supplementary material
Source: Springer Nature journal article supplement (https://www.springermedizin.de/resource/supplementary/12883_2010_387_MOESM5_ESM.pdf/9455038)

mean rest IOP vs. Altitude

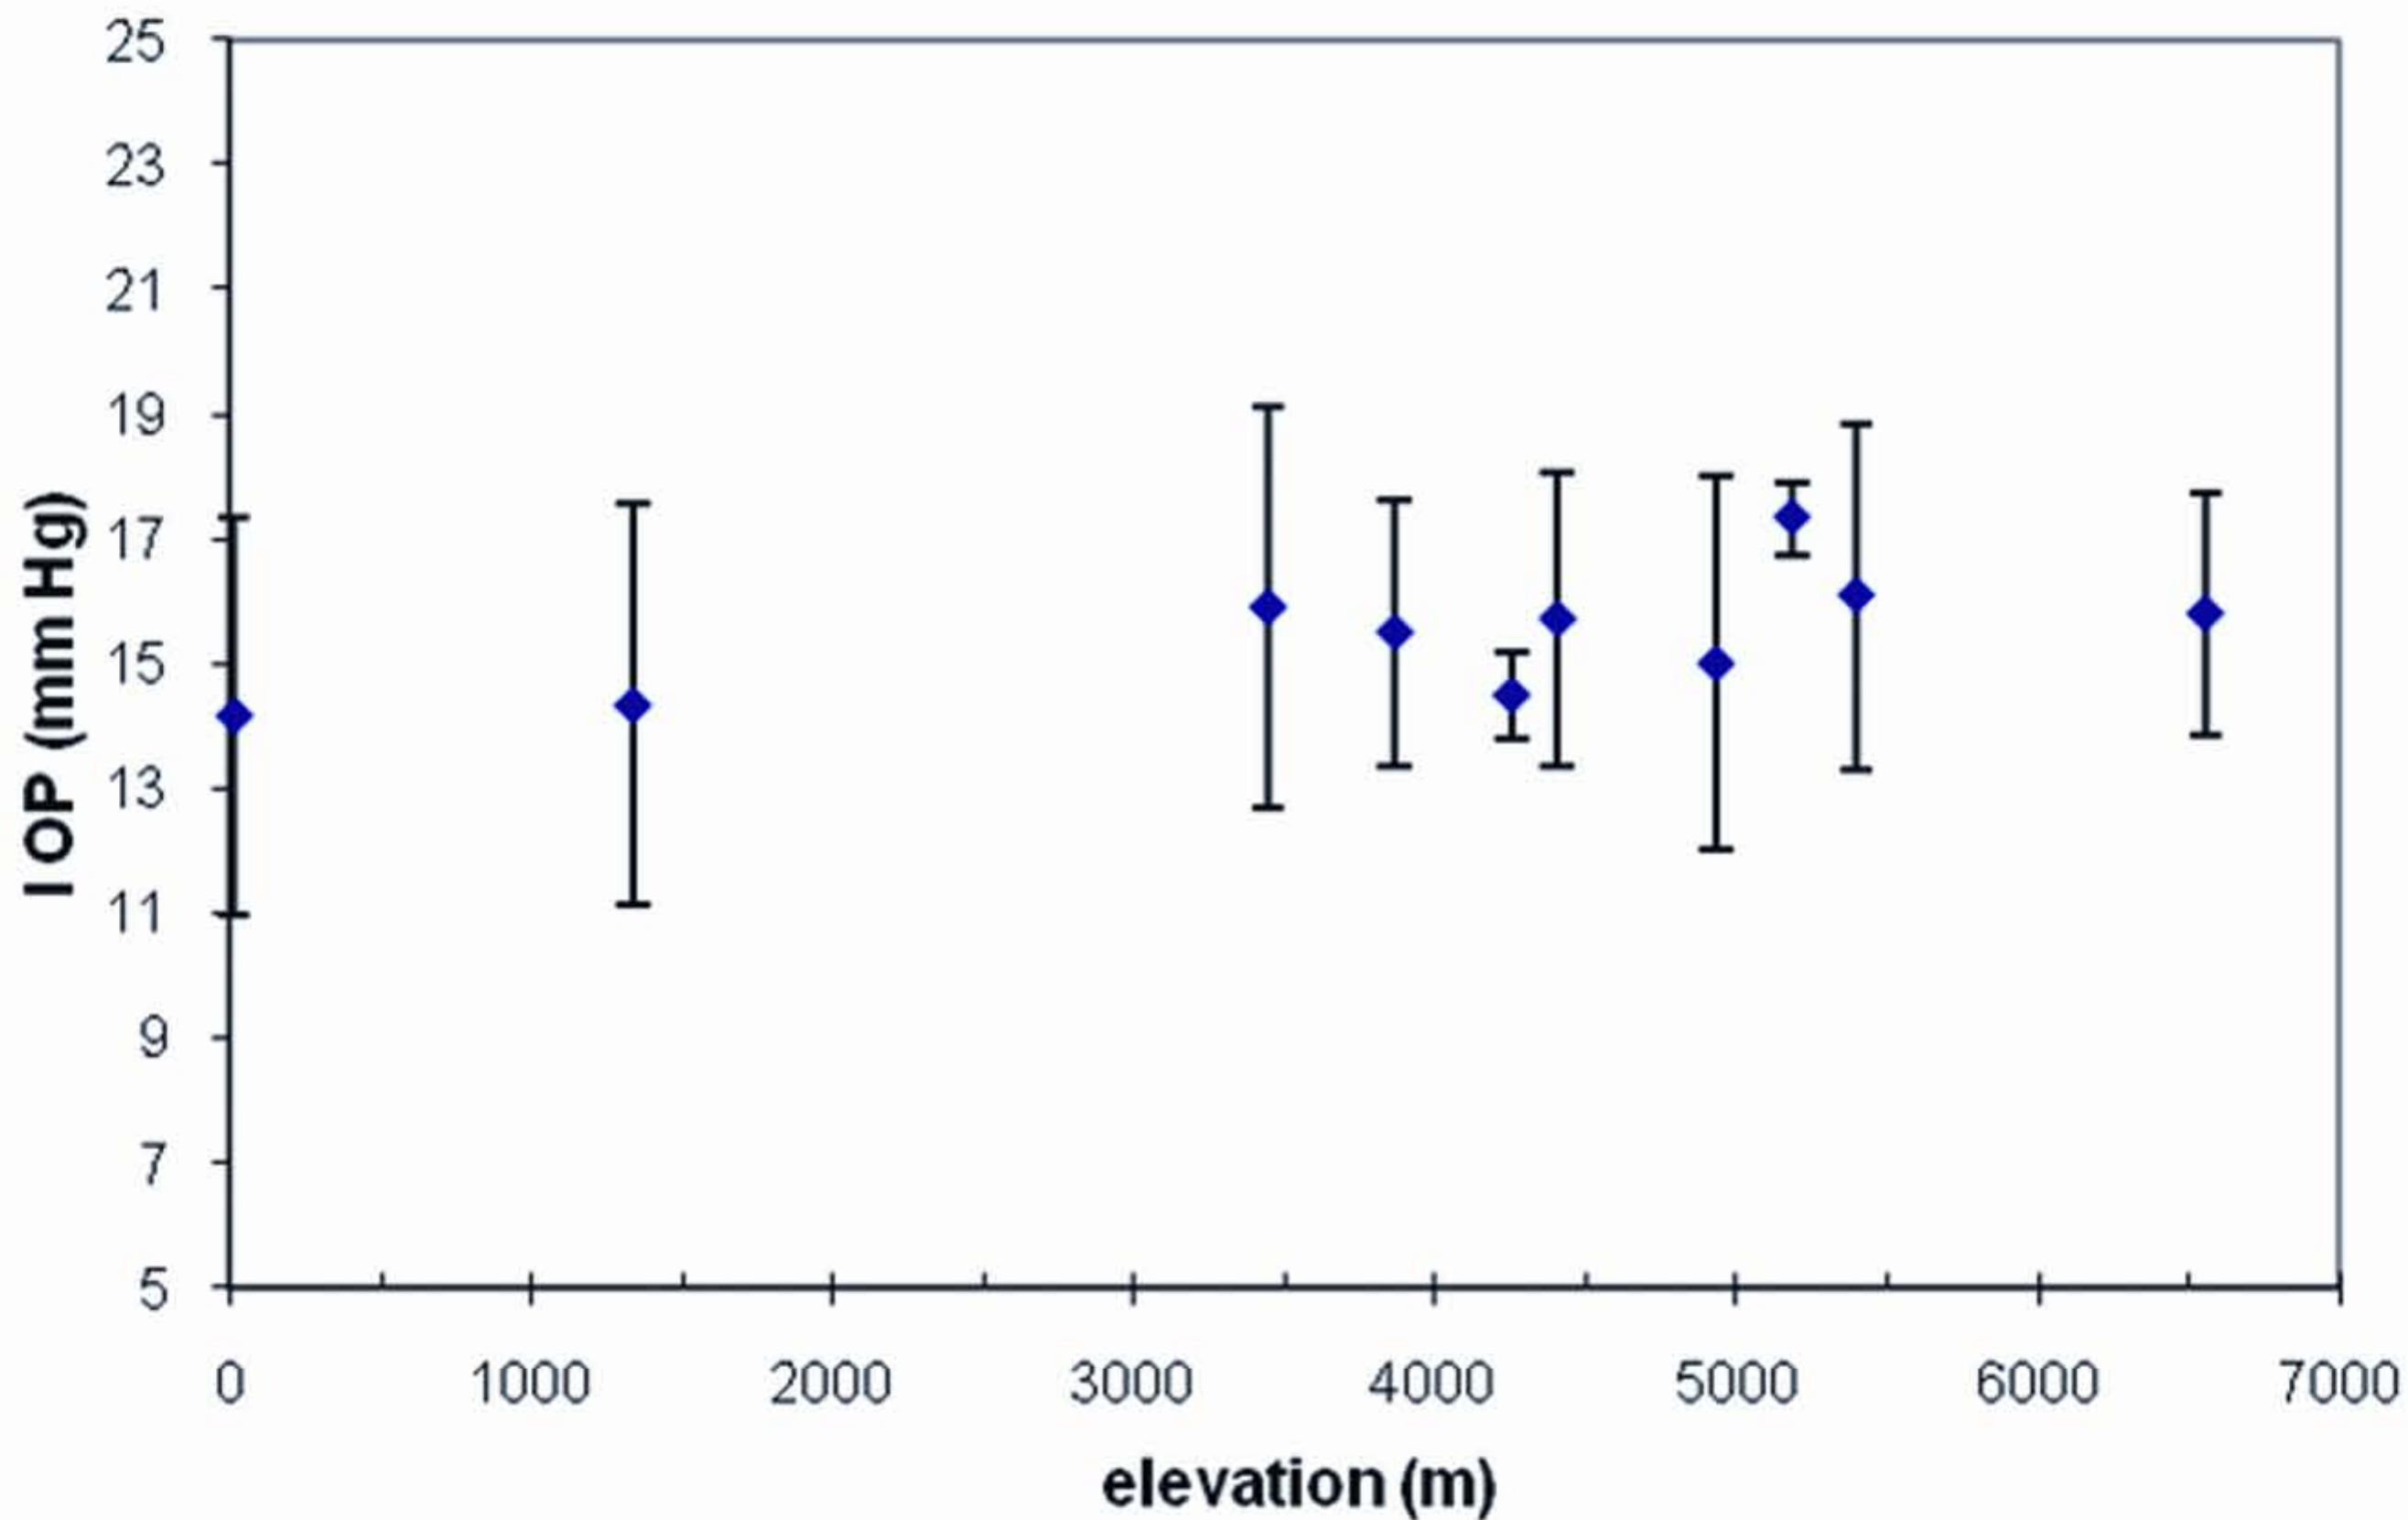

Supplement: MOESM5 [file 9455038]
